# Supplementary material for: Virtual reality experiences promote autobiographical retrieval mechanisms: Electrophysiological correlates of laboratory and virtual experiences
Source: Springer Nature journal article supplement (doi:10.1007/s00426-020-01417-x), 2020-09-15
Supplement: MOESM1 [file 18383228]

## Description of stimulus material (from Library of universal virtual reality experiments (luVRe))

accessed via [https://www.psych.uni-osnabrueck.de/fachgebiete/allgemeine\\_psychologie\\_i/luvre.html](https://www.psych.uni-osnabrueck.de/fachgebiete/allgemeine_psychologie_i/luvre.html)

| <b>luvre code</b> | <b>class</b> | <b>content</b>                                                 |
|-------------------|--------------|----------------------------------------------------------------|
| x_0101.mp4        | target       | View on canal in Amsterdam (tourist attraction)                |
| x_0106.mp4        | target       | a public toilette                                              |
| x_0202.mp4        | target       | Reticulated python in an aquarium                              |
| x_0301.mp4        | target       | Gym of a hotel (without people)                                |
| x_0311.mp4        | target       | Hotel room with guests sitting on a couch                      |
| x_0504.mp4        | target       | Prison cell in a museum                                        |
| x_0702.mp4        | target       | Cows in a barn                                                 |
| x_0803.mp4        | target       | Technical instruments in an atomic shelter                     |
| x_1005.mp4        | target       | View on a lake in autumn                                       |
| x_1202.mp4        | target       | Soccer training                                                |
| x_1603.mp4        | target       | Boars in enclosure                                             |
| x_6501.mp4        | target       | Choir sings in a cathedral in presence of an audience          |
| x_1607.mp4        | target       | Elbe Philharmonic Hall (exterior, Hamburg)                     |
| x_1705.mp4        | target       | Showact: Groups of boys dancing breakdance (1)                 |
| x_2203.mp4        | target       | Shop for motorcycles and equipment                             |
| x_2312.mp4        | target       | A man is treated by an oculist                                 |
| x_2314.mp4        | target       | Paramedics carry a woman on a gurney                           |
| x_2602.mp4        | target       | Pole dancing woman                                             |
| x_2701.mp4        | target       | Original prison cells (without prisoners)                      |
| x_2705.mp4        | target       | Staircase with suicide prevention in a prison                  |
| x_2801.mp4        | target       | Horse riding                                                   |
| x_2901.mp4        | target       | Slide in a swimming centre                                     |
| x_3001.mp4        | target       | A group of men stripping (show with large audience)            |
| x_3104.mp4        | target       | Inside Carmen de los Mártires (Granada, Spain)                 |
| x_3201.mp4        | target       | Hotel bar with guests                                          |
| x_3307.mp4        | target       | Hotel corridor without guests                                  |
| x_3313.mp4        | target       | Kitchen in a hotel suite                                       |
| x_3503.mp4        | target       | Dental treatment room                                          |
| x_3603.mp4        | target       | Tuco-tuco (rat species: Ctenomys, Ctenomyidae) in an enclosure |
| x_3609.mp4        | target       | Arctic foxes looking for food in enclosure                     |

|                  |            |                                                                                             |
|------------------|------------|---------------------------------------------------------------------------------------------|
| x_4223.mp4       | target     | Red carpet of a prom night                                                                  |
| x_4303.mp4       | target     | Man in a cave                                                                               |
| x_4405.mp4       | target     | Tattooist tattoos a young woman at her ankle                                                |
| x_5503.mp4       | target     | A group of young people searches and examines a room                                        |
| X_4602.mp4       | target     | Two women ordering doner kebab in a fast food restaurant                                    |
| x_4702.mp4       | target     | People entering and leaving a cinemas' salesroom                                            |
| x_4801.mp4       | target     | Christmas party of a university department (Osnabrück University, Department of Psychology) |
| x_4903.mp4       | target     | Puppies playing                                                                             |
| x_5001.mp4       | target     | Sparsely lit mine tunnel                                                                    |
| x_5102.mp4       | target     | Funeral room with a laid coffin (empty)                                                     |
| x_5202.mp4       | target     | Minigolf in a black light course                                                            |
| x_5303.mp4       | target     | View on shelves in a supermarket without people)                                            |
| x_5402.mp4       | target     | Interior view of a church steeple                                                           |
| x_5602.mp4       | target     | Young pianist playing                                                                       |
| x_5702.mp4       | target     | view of an approaching helicopter                                                           |
| x_5802.mp4       | target     | A group of young women doing squats and lunges                                              |
| x_5903.mp4       | target     | Two persons shooting at targets in a training facility                                      |
| x_6001.mp4       | target     | Traffic at the train station                                                                |
| x_6303.mp4       | target     | The karate fighters surround the camera during training and shout fiercely                  |
| no code assigned | target     | A screaming man runs into the room, pointing a gun at the camera                            |
|                  |            |                                                                                             |
| x_0105.mp4       | distractor | dark interior of a building in Amsterdam                                                    |
| x_0306.mp4       | distractor | Restaurant of a hotel (without people)                                                      |
| x_0405.mp4       | distractor | Car in a dark car park                                                                      |
| x_0701.mp4       | distractor | Aviary with doves                                                                           |
| x_0706.mp4       | distractor | Horse in an indoor stable                                                                   |
| x_0802.mp4       | distractor | Switchboard in an atomic shelter                                                            |
| x_0901.mp4       | distractor | People partying in a disco                                                                  |
| x_1007.mp4       | distractor | Field path                                                                                  |
| x_1102.mp4       | distractor | Fire engines driving out of the garage                                                      |
| x_1303.mp4       | distractor | Museum: Miniature Wonderland                                                                |
| x_1501.mp4       | distractor | Woman spraying graffiti on the wall of an abandoned building                                |
| x_1605.mp4       | distractor | Deers in an enclosure                                                                       |
| x_1609.mp4       | distractor | Hamburg's "Landungsbrücken" (bridge)                                                        |

|            |            |                                                                                        |
|------------|------------|----------------------------------------------------------------------------------------|
| x_1613.mp4 | distractor | Willkomm-Höft (Ship Greeting Station Welcome Point in Hamburg, Germany)                |
| x_1615.mp4 | distractor | Woman singing and playing the guitar                                                   |
| x_1910.mp4 | distractor | Kart race with view from the grandstand                                                |
| x_2001.mp4 | distractor | Artist working on his artwork (constructed from yarns)                                 |
| x_2003.mp4 | distractor | Art installation in an art galery                                                      |
| x_2109.mp4 | distractor | Group of MMA fighters doing a battle shout                                             |
| x_2201.mp4 | distractor | Parking lot for motorbikes                                                             |
| x_2301.mp4 | distractor | Trauma room in an emergency department ( without people, no blood or injuries visible) |
| x_2304.mp4 | distractor | Ward room in an emergency department (without people, no blood or injuries visible)    |
| x_2317.mp4 | distractor | Ambulance arrives at the hospital                                                      |
| x_2703.mp4 | distractor | Exterior view on prison cells                                                          |
| x_2704.mp4 | distractor | Shower room                                                                            |
| x_2903.mp4 | distractor | Free fall slide in a swimming centre, people are riding it                             |
| x_3103.mp4 | distractor | Courtyard of Carmen de los Mártires (Granada, Spain)                                   |
| x_3105.mp4 | distractor | Inner yard of Carmen de los Mártires                                                   |
| x_3107.mp4 | distractor | Market place at night                                                                  |
| x_3304.mp4 | distractor | Winery without guests                                                                  |
| x_3310.mp4 | distractor | Empty room of a hotel                                                                  |
| x_3401.mp4 | distractor | Wien City Prater                                                                       |
| x_3606.mp4 | distractor | Penguins in enclosure                                                                  |
| x_3701.mp4 | distractor | Motorway bridge                                                                        |
| x_3802.mp4 | distractor | People bouldering                                                                      |
| x_3903.mp4 | distractor | Interior of a luxurious campervan                                                      |
| x_4001.mp4 | distractor | Witness stand of a courtroom                                                           |
| x_4101.mp4 | distractor | Wodden attic of an ancient mill                                                        |
| x_4220.mp4 | distractor | Opening dance during a prom night                                                      |
| x_4221.mp4 | distractor | Outerior of Osnabrück Halle (building in Osnabrück, Germany)                           |
| X_4502.mp4 | distractor | Ferris wheel going upwards, one person in the cabine (Osnabrück, Germany)              |
| X_4704.mp4 | distractor | Interior of a dimly lit bar with flickering lights                                     |
| x_5401.mp4 | distractor | View over the city of Osnabrück from the church steeple                                |
| x_5904.mp4 | distractor | An elderly man shooting with a rifle at targets                                        |
| x_5906.mp4 | distractor | People sitting in a club bar                                                           |
| x_6003.mp4 | distractor | A train leaving the station                                                            |
| x_6101.mp4 | distractor | A young man's hair is cut.                                                             |

x\_6201.mp4

x\_6402.mp4

no code assigned

distractor

distractor

distractor

A mixed group trains karate

Interior view of a laser tag arena during the game

A couple is discussing fiercely
